# Supplementary material for: Promoting Routine Exercise in Frail Nursing Home Residents through Nudge-Based Strategies: Protocol for an Exploratory Sequential Mixed-Methods Study
Source: Research Square preprint supplement (doi:10.21203/rs.3.rs-8520226/v1), 2026-01-20
Supplement: Supplementary file 1 [file 9878f7f6d59e9eaf8a544e9d.docx]

**Supplementary Material**

Table S1. Interview outline based on the Fogg Behaviour Model

Table S2. Description of the seated Baduanjin intervention

Table S3. Interview outline of frail residents’ satisfaction with seated Baduanjin intervention

Table S1. Interview outline based on the Fogg Behaviour Model

| **Part Ⅰ: Confirm whether the care staff has experience leading exercise for the residents, which will serve as a branching point for subsequent questions.** | | |
| --- | --- | --- |
| In your daily work, do you lead or assist the residents in exercise? (e.g., group exercises, resistance training) | | |
| **Lead** →  Please proceed to **Path A** and subsequent sections. | | **Not led** →  Please skip to **Path B** and subsequent sections. |
| **Fogg Behaviour Mode**  **domain** | **Part 2: For care staffs with experience leading exercise (Path A).** | |
| Motivation | What motivates you to lead exercise for the residents? Is it because you find it personally meaningful, rewarding? | |
| Motivation | Does the nursing home have specific requirements or incentive policies (e.g., performance reviews, recognition) that encourage you to do this? | |
| Ability | Do you feel you have sufficient exercise knowledge and techniques to lead the residents? Where did you learn these (e.g., nursing home training, self-study, learned from colleagues)? | |
| Ability | What is the biggest difficulty or challenge you encounter when leading exercise? (e.g., low participation, varying exercise preferences among residents, safety concerns, time constraints). | |
| Ability | If we were to start a new exercise programme, what training or resources do you need? (e.g., guidance from a professional therapist, clear instructional videos). | |
| Prompt | What typically prompts you to start to lead exercise for the residents? (e.g., fixed daily schedule, notice from manager). | |
|  | **Part 3: For care staffs without experience leading exercise (Path B).** | |
| Motivation | What are the main reasons you haven’t led exercise before? | |
| Motivation | If you personally lack interest in leading exercise, what specific concerns contribute to this reluctance? | |
| Ability | If you were asked to lead exercise now, what would be the biggest obstacle? | |
| Prompt | Under what circumstances might you be willing to try leading exercises? | |
| Aside from everything we’ve discussed, are there any other thoughts, experiences, or suggestions you have? Whether related to yourself, the residents, or nursing home, we welcome all feedback. | | |

Table S2. Description of the seated Baduanjin intervention

| Movement | Description | Frequency |
| --- | --- | --- |
| The Preparatory Posture | Sit up straight with feet shoulder-width apart, looking straight ahead.  Place the palms in front of your abdomen, spaced by length of a fist, with Dantian (elixir field, centre of the lower abdomen) as the middle point. | - |
| Routine 1:Holding Up the Sky with Both Hands to Regulate the Sanjiao | Step 1 (Inhale):  Cross your fingers in front of the abdomen.  Lift both hands upwardss to Danzhong point (mid-chest), rotating your palms to face outwards as they rise.  Continue lifting your hands above your forehead while gently tilting your head backwards to face upwardss.  Step 2:  Extend your arms fully upwardss, aligning them with your ears.  Return your head to neutral position, facing forward with eyes looking straight ahead.  Maintain this stretched posture momentarily.  Step 3 (Exhale):  Slowly lower both arms down to your sides.  Return to the starting position by recrossing your hands in front of the abdomen. | 6 repetitions |
| Routine 2:Drawing the Bow to Shoot the Hawk | Step 1:  Cross your wrists at chest level (left wrist over right for standard variation)  Maintain relaxed shoulders and upright posture  Step 2 (Inhale):  Pull your right palm horizontally to right chest (as if drawing bowstring)  Simultaneously, extend left arm sideways:  Form Tiger's Mouth Palm  Keep both arms at shoulder height  Focus eyes intensely on left fingertips  Imagine stretching a bow to full tension  Step 3 (Exhale):  Initiate return by arcing right hand downwardss  Gather palms together before abdomen  Step 4: Repeat the movement alternating left and right sides. | 3 repetitions  (Left + Right = 1 rep) |
| Routine 3:Holding one arm aloft to regulate the spleen and stomach | Step 1:  Raise both palms to the level of Zhongwan point (mid-abdomen, between the navel and sternum)  Step 2 (Inhale):  Left Hand:  Rotate the palm inward at Danzhong point (mid-chest)  Lift the left hand to the upper-left side of your head  Right Hand:  Simultaneously rotate the palm downwards  Push the root of your right hand down, with Hukou facing your lower limbs.  Step 3 (Exhale):  Slowly lower the left arm along the same upwards path  Return both hands to the starting position in front of the abdomen  Step 4: Repeat the movement alternating left and right sides. | 3 repetitions  (Left + Right = 1 rep) |
| Routine 4:Looking Back to Relieve the Five Strains and Seven Impairments | Step 1:  Stretch the arms out sideways from the body.  Step 2 (Inhale):  Rotate your hands so the palms face outward  Slowly turn your head horizontally to the left  Focus your eyes on the lower left rear area  Step 3 (Exhale):  Gently return your head to center, looking straight ahead  Rotate palms to face inward  Step 4: Repeat the movement alternating left and right sides. | 3 repetitions  (Left + Right = 1 rep) |
| Routine 5:Swinging the Head and Wagging the Hips to Eliminate Heart Fire | Step 1 (Inhale): Sit up straight with your spine erect.  Rotate your hands inward and place your palms flat on the tops of your thighs.  Grip firmly near the top of your thighs with the “tiger's mouth” (the web between your thumb and index finger) to stabilize your upper body and maintain balance.  Step 2: (Exhale): Raise your head back and looking upwards.  Lean your upper body towards the left side.  Using your pelvis as a fixed pivot point, guide your torso in a smooth, continuous arc backwards to forward on the left side.  Step 3 (Inhale):  Gradually shift your weight from your left side to your right side.  Step 4: (Exhale): Lean your upper body towards the right side.  Again using your pelvis as the pivot, guide your torso in a smooth, continuous arc forward to backwards on the right side. Return to the upright starting position.  Step 5: Repeat the movement alternating left and right sides. | 3 repetitions  (Left + Right = 1 rep) |
| Routine 6:Touching Legs with Hands to Strengthen the Kidney and Waist | Step 1 (Inhale):  Raise your arms upwardss with your palms facing each other.  Step 2 (Exhale):  Lower your hands to chest level, turning your palms downwardss with the fingertips facing each other. Continue lowering your palms to the Rugen acupoint (located just below the collarbone).  Step 3 (Inhale):  Rotate your palms to face upwardss while keeping your eyes looking straight ahead. Reverse your palms through to the back, then trace your back down through Shenshu and Yaoyan acupoints.  Step 4 (Exhale):  Trace your hips, laps and knees.  Step 5 (Inhale):  Raise both arms upwardss again, press your back gently against the chair.  Arch your body backwardss as far as is comfortable while maintaining stability.  Step 6 (Exhale):  Slowly lower your hands to the sides of your thighs, returning to the original preparatory posture. | 6 repetitions |
| Routine 7:Punching with a Fierce Gaze | Step 1:  Hold both fists firmly at the waist, with the knuckle sides facing upwardss.  Step 2 (Inhale):  Punch forward with the left fist.  Glare at the fist with a fierce gaze when two-thirds extended.  Step 3 (Exhale):  Transform the fist into an open palm, turning it inwards, then rotating outwards until the palm faces forward, then continue rotating until the fingertips point downwardss.  Close the palm back into a tight fist.  Step 4 (Inhale):  Withdraw fist to the waist, with the knuckle sides facing upwardss. | 3 repetitions  (Left + Right = 1 rep) |
| Routine 8:Stamping Heels Seven Times to Cure All Diseases | Step 1:  Stand with your feet together.  Step 2 (Inhale):  Lift the heels off the ground.  Stretch your head upwardss.  Tighten your hips and lift your anus.  Step 3 (Exhale):  Bring the heels down to stamp on the ground gently. | 7 repetitions |
| The Closing Posture | Interlock your palms in the Dantian . Look straight ahead and relax your body. | - |

Table S3. Interview outline of frail residents’ satisfaction with seated Baduanjin intervention

| 1.Appraise of the Care staff’s Instruction: |
| --- |
| Could you share your views on the care staff who administer the seated Baduanjin sessions, including their clarity of instruction, professionalism, teaching style, and general attitude? |
| What impact did the care staff’s guidance have on your practice effectiveness? |
| 2.Appraise of Exercise Effects: |
| What have you experienced since starting the seated Baduanjin sessions? |
| 3.Appraise of the Exercise Arrangement: |
| How did you appraise the difficulty and intensity of the seated Baduanjin sessions? |
| What aspects were particularly beneficial or challenging for you? |
