# Supplementary material for: Promoting Routine Exercise in Frail Nursing Home Residents through Nudge-Based Strategies: Protocol for an Exploratory Sequential Mixed-Methods Study
Source: Research Square preprint supplement (doi:10.21203/rs.3.rs-8520226/v1), 2026-01-20
Supplement: Supplementary file 2 [file d2dfa9e922b1de6eebf6b734.docx]

| **SPIRIT 2025 checklist** | | | | |
| --- | --- | --- | --- | --- |
| **Title:**Promoting Routine Exercise in Frail Nursing Home Residents through Nudge-Based Strategies: Protocol for an Exploratory Sequential Mixed-Methods Study | | | | |
| **Section/topic** | **No** | **SPIRIT 2025 checklist item description** | **Page** | **Explanation** |
| **Administrative information** ☑ | | |  |  |
| Title and structured summary | 1a | Title stating the trial design, population, and interventions, with identification as a protocol | 1 |  |
| 1b | Structured summary of trial design and methods, including items from the World Health Organization Trial Registration Data Set | 1 |  |
| Protocol version | 2 | Version date and identifier | 1 |  |
| Roles and responsibilities | 3a | Names, affiliations, and roles of protocol contributors | 1, 22 |  |
| 3b | Name and contact information for the trial sponsor | 1 |  |
| 3c | Role of trial sponsor and funders in design, conduct, analysis, and reporting of trial; including any authority over these activities | 22 |  |
| 3d | Composition, roles, and responsibilities of the coordinating site, steering committee, endpoint adjudication committee, data management team, and other individuals or groups overseeing the trial, if applicable |  | Not applicable. This study will be directly implemented, with data collection and management undertaken by the research team based at . The Principal Investigator (Ming Li) bears overall responsibility for the scientific integrity, ethical compliance, and safety of the research. |
| **Open science** | | |  |  |
| Trial registration | 4 | Name of trial registry, identifying number (with URL), and date of registration. If not yet registered, name of intended registry | 2 |  |
| Protocol and statistical analysis plan | 5 | Where the trial protocol and statistical analysis plan can be accessed | 22 |  |
| Data sharing | 6 | Where and how the individual de-identified participant data (including data dictionary), statistical code, and any other materials will be accessible | 22 |  |
| Funding and conflicts of interest | 7a | Sources of funding and other support (for example, supply of drugs) | 22 |  |
| 7b | Financial and other conflicts of interest for principal investigators and steering committee members | 22 |  |
| Dissemination policy | 8 | Plans to communicate trial results to participants, healthcare professionals, the public, and other relevant groups (for example, reporting in trial registry, plain language summary, publication) | 19 |  |
| **Introduction** ☑ | | |  |  |
| Background and rationale | 9a | Scientific background and rationale, including summary of relevant studies (published and unpublished) examining benefits and harms for each intervention | 2-3 |  |
| 9b | Explanation for choice of comparator | Not applicable. | This trial adopt a quasi-experimental hybrid type II effectiveness-implementation design. |
| Objectives | 10 | Specific objectives related to benefits and harms | 4 |  |
| **Methods: Patient and public involvement, trial design** | | |  |  |
| Patient and public involvement | 11 | Details of, or plans for, patient or public involvement in the design, conduct, and reporting of the trial | 23 |  |
| Trial design | 12 | Description of trial design including type of trial (for example, parallel group, crossover), allocation ratio, and framework (for example, superiority, equivalence, non-inferiority, exploratory) | 4-5 |  |
| **Methods: Participants, interventions, and outcomes** | | |  |  |
| Trial setting | 13 | Settings (for example, community, hospital) and locations (for example, countries, sites) where the trial will be conducted | 7 |  |
| Eligibility criteria | 14a | Eligibility criteria for participants | 5, 7-8 | Qualitative part and quantitative part. |
| 14b | If applicable, eligibility criteria for sites and for individuals who will deliver the interventions (for example, surgeons, physiotherapists) | 8 |  |
| Intervention and comparator | 15a | Intervention and comparator with sufficient details to allow replication including how, when, and by whom they will be administered. If relevant, where additional materials describing the intervention and comparator (for example, intervention manual) can be accessed | 8-13 |  |
| 15b | Criteria for discontinuing or modifying allocated intervention/comparator for a trial participant (for example, drug dose change in response to harms, participant request, or improving/worsening disease) | 13 | “Program modifications will be made for any participant experiencing an adverse event related to the intervention.” |
| 15c | Strategies to improve adherence to intervention/comparator protocols, if applicable, and any procedures for monitoring adherence (for example, drug tablet return, sessions attended) | 14 | “Adherence is calculated for both frail residents and the care staff as the percentage of completed exercise sessions out of the total sessions prescribed in the intervention protocol, based on documentation forms completed for each session.” |
| 15d | Concomitant care that is permitted or prohibited during the trial | 7 |  |
| Outcomes | 16 | Primary and secondary outcomes, including the specific measurement variable (for example, systolic blood pressure), analysis metric (for example, change from baseline, final value, time to event), method of aggregation (for example, median, proportion), and time point for each outcome | 13-17 |  |
| Harms | 17 | How harms are defined and will be assessed (for example, systematically, non-systematically) | 12-13 |  |
| Participant timeline | 18 | Time schedule of enrollment, interventions (including any run-ins and washouts), assessments, and visits for participants. A schematic diagram is highly recommended. | 9, 10,13 | Page 9 describes the timing of the exercise interventions.  Page 10 (Figure 3) illustrates the schedule of the overall CARE program.  Page 13 specifies that data will be collected at three time points. |
| Sample size | 19 | How sample size was determined, including all assumptions supporting the sample size calculation | 5, 8 | Qualitative part and quantitative part. |
| Recruitment | 20 | Strategies for achieving adequate participant enrollment to reach target sample size | 5, 8 | Qualitative part and quantitative part. |
| **Methods: Assignment of interventions** | | |  |  |
| Randomization: | | |  |  |
| Sequence generation | 21a | Who will generate the random allocation sequence and the method used | Not applicable. | Because our study is pre-post design, with all participants will be included in the study, so those administering the interventions, and those assessing the outcomes are not blinded to study condition assignment. However, data collection will be conducted by undergraduate research assistants who are blinded to the study design to minimize assessment bias. |
| 21b | Type of randomization (simple or restricted) and details of any factors for stratification. To reduce predictability of a random sequence, other details of any planned restriction (for example, blocking) should be provided in a separate document that is unavailable to those who enroll participants or assign interventions | Not applicable. | Same as above. |
| Allocation concealment mechanism | 22 | Mechanism used to implement the random allocation sequence (for example, central computer/telephone; sequentially numbered, opaque, sealed containers), describing any steps to conceal the sequence until interventions are assigned | Not applicable. | Same as above. |
| Implementation | 23 | Whether the personnel who will enroll and those who will assign participants to the interventions will have access to the random allocation sequence | Not applicable. | Same as above. |
| Blinding | 24a | Who will be blinded after assignment to interventions (for example, participants, care providers, outcome assessors, data analysts) | Not applicable. | Same as above. |
| 24b | If blinded, how blinding will be achieved and description of the similarity of interventions | Not applicable. | Same as above. |
| 24c | If blinded, circumstances under which unblinding is permissible, and procedure for revealing a participant’s allocated intervention during the trial | Not applicable. | Same as above. |
| **Methods: Data collection, management, and analysis** | | |  |  |
| Data collection methods | 25a | Plans for assessment and collection of trial data, including any related processes to promote data quality (for example, duplicate measurements, training of assessors) and a description of trial instruments (for example, questionnaires, laboratory tests) along with their reliability and validity, if known. Reference to where data collection forms can be accessed, if not in the protocol | 6, 13 | Qualitative part and quantitative part. |
| 25b | Plans to promote participant retention and complete follow-up, including list of any outcome data to be collected for participants who discontinue or deviate from intervention protocols | 11 |  |
| Data management | 26 | Plans for data entry, coding, security, and storage, including any related processes to promote data quality (for example, double data entry; range checks for data values). Reference to where details of data management procedures can be accessed, if not in the protocol | 6, 18 | Qualitative part and quantitative part. |
| Statistical methods | 27a | Statistical methods used to compare groups for primary and secondary outcomes, including harms | 18 |  |
| 27b | Definition of who will be included in each analysis (for example, all randomized participants), and in which group | 18 |  |
| 27c | How missing data will be handled in the analysis | Not applicable. | This study employed a per-protocol (PP) analysis. |
| 27d | Methods for any additional analyses (for example, subgroup and sensitivity analyses) | 18 |  |
| **Methods: Monitoring** | | |  |  |
| Data monitoring committee | 28a | Composition of data monitoring committee (DMC); summary of its role and reporting structure; statement of whether it is independent from the sponsor and funder; conflicts of interest and reference to where further details about its charter can be found, if not in the protocol. Alternatively, an explanation of why a DMC is not needed |  | A formal DMC is not deemed necessary for this study because it is a low-risk, single-arm, Phase II trial with a small sample size. Safety monitoring will be continuously performed by the Principal Investigator and reported directly to the Ethics Committee. |
| 28b | Explanation of any interim analyses and stopping guidelines, including who will have access to these interim results and make the final decision to terminate the trial | 11 | One interim analysis is planned at Week 13. The primary purpose is to provide a preliminary assessment of safety and early efficacy trends for internal review and discussion at the Week 13 Feedback Meeting. |
| Trial monitoring | 29 | Frequency and procedures for monitoring trial conduct. If there is no monitoring, give explanation | 12 | “Throughout this care staff-administered period, the research team will monitor intervention fidelity through unannounced checks twice a week and immediate feedback.” |
| **Ethics** | | |  |  |
| Research ethics approval | 30 | Plans for seeking research ethics committee/institutional review board approval | 21-22 |  |
| Protocol amendments | 31 | Plans for communicating important protocol modifications to relevant parties | 21-22 |  |
| Consent or assent | 32a | Who will obtain informed consent or assent from potential trial participants or authorized proxies, and how | 5, 8, 21-22 |  |
| 32b | Additional consent provisions for collection and use of participant data and biological specimens in ancillary studies, if applicable | Not applicable. |  |
| Confidentiality | 33 | How personal information about potential and enrolled participants will be collected, shared, and maintained in order to protect confidentiality before, during, and after the trial | 6 | “Identifying information was removed from transcripts to maintain anonymity.” |
| Ancillary and post-trial care | 34 | Provisions, if any, for ancillary and post-trial care, and for compensation to those who suffer harm from trial participation | Not applicable. |  |
